# Supplementary material for: Identification of four novel flavonoid adducts in Arabidopsis thaliana (L.) exposed to isobutyl S-2-diethylaminoethyl methylphosphonothiolate as potential plant exposure biomarkers
Source: Royal Society of Chemistry journal article supplement (doi:10.1039/d2ra06879f), 2022-01-01
Supplement: d2ra06879f1.pdf [file d2ra06879f1.pdf]

## Supplementary Information

### Identification of four novel flavonoid adducts in *Arabidopsis thaliana* (L.) exposed to isobutyl S-2-diethylaminoethyl methylphosphonothiolate as potential plant exposure biomarkers

Zhongfang Xing <sup>a</sup>, Ruiqian Zhang <sup>a</sup>, Zhehui Zhao <sup>b</sup>, Liangliang Wang <sup>a</sup>, Ling Yuan <sup>a</sup>, Huilan Yu <sup>a</sup>, Yang Yang <sup>a</sup>, Yuntao Yang <sup>a</sup>, Shilei Liu <sup>a,\*</sup>, Chengxin Pei <sup>a,\*</sup>

<sup>a</sup> State Key Laboratory of NBC Protection for Civilian, Beijing 102205, China

<sup>b</sup> State Key Laboratory of Bioactive Substances and Functions of Natural Medicines, Department of Medicinal Chemistry, Institute of Materia Medica, Chinese Academy of Medical Sciences & Peking Union Medical College, Beijing 100050, China

\* Corresponding author.

E-mail address: liu\_shilei@lacrind.com (S. Liu),

chengxin.riid@yahoo.com.cn (C. Pei)

### Table of contents

|                                                                                                                                                                                                                                           |    |
|-------------------------------------------------------------------------------------------------------------------------------------------------------------------------------------------------------------------------------------------|----|
| Fig. S1. Chemical structure of iBuVX.....                                                                                                                                                                                                 | 2  |
| Fig. S2. <sup>1</sup> H NMR spectrum of iBuVX.....                                                                                                                                                                                        | 3  |
| Fig. S3. <sup>13</sup> C NMR spectrum of iBuVX.....                                                                                                                                                                                       | 4  |
| Fig. S4. <sup>31</sup> P NMR spectrum of iBuVX.....                                                                                                                                                                                       | 5  |
| Fig. S5. Product ion mass spectrum of <b>compound 1</b> .....                                                                                                                                                                             | 5  |
| Fig. S6. Product ion mass spectrum of <b>compound 2</b> .....                                                                                                                                                                             | 6  |
| Fig. S7. Product ion mass spectrum of m/z 897.2553 ( <b>compound 4</b> ) in the extracts of leaves from <i>Arabidopsis thaliana</i> (L.) exposed to iBuVX.....                                                                            | 6  |
| Fig. S8. Product ion mass spectrum of m/z 751.1974 ( <b>compound 5</b> ) in the extracts of leaves from <i>Arabidopsis thaliana</i> (L.) exposed to iBuVX.....                                                                            | 7  |
| Fig. S9. Product ion mass spectrum of m/z 869.2521( <b>compound 7</b> ) in the extracts of leaves from <i>Arabidopsis thaliana</i> (L.) exposed to iBuVX.....                                                                             | 8  |
| Fig. S10 The lowest energy conformations of <b>compound 1</b> and <b>compound 2</b> .....                                                                                                                                                 | 8  |
| Fig. S11. Chemical structure of the synthesized <b>compound 6</b> with atoms numbering.....                                                                                                                                               | 9  |
| Fig. S12. <sup>1</sup> H NMR spectrum of the synthesized <b>compound 6</b> .....                                                                                                                                                          | 9  |
| Fig. S13. <sup>13</sup> C NMR spectrum of the synthesized <b>compound 6</b> .....                                                                                                                                                         | 10 |
| Fig. S14. <sup>31</sup> P NMR spectrum of the synthesized <b>compound 6</b> .....                                                                                                                                                         | 11 |
| Fig. S15. Product ion mass spectrum of m/z 735.2024 from the synthesized <b>compound 6</b> .....                                                                                                                                          | 12 |
| Fig. S16. EICs (m/z 897.2553) of the extracts of leaves from plants of <i>Nicotiana tabacum</i> Linn., <i>Pisum sativum</i> Linn., <i>Tagetes erecta</i> Linn. and <i>Arabidopsis thaliana</i> (L.) leaves with no exposure to iBuVX..... | 12 |
| Fig. S17. EICs (m/z 751.1974) of the extracts of leaves from plants of <i>Nicotiana tabacum</i> Linn., <i>Pisum sativum</i> Linn., <i>Tagetes erecta</i> Linn. and <i>Arabidopsis thaliana</i> (L.) leaves with no exposure to iBuVX..... | 13 |
| Fig. S18. EICs (m/z 735.2024) of the extracts of leaves from plants of <i>Nicotiana tabacum</i> Linn., <i>Pisum sativum</i> Linn., <i>Tagetes erecta</i> Linn. and <i>Arabidopsis thaliana</i> (L.) leaves with no exposure to iBuVX..... | 13 |

Fig. S19. EICs (m/z 869.2521) of the extracts of leaves from plants of *Nicotiana tabacum* Linn., *Pisum sativum* Linn., *Tagetes erecta* Linn. and *Arabidopsis thaliana* (L.) leaves with no exposure to iBuVX .....14

|                                                                                                                                                                     |    |
|---------------------------------------------------------------------------------------------------------------------------------------------------------------------|----|
| Table S1. The assignment of $^1\text{H}$ NMR of iBuVX .....                                                                                                         | 3  |
| Table S2. The assignment of $^{13}\text{C}$ NMR of iBuVX .....                                                                                                      | 4  |
| Table S3. The deviations between calculated and observed m/z values of each fragment derived from <b>compound 1</b> .....                                           | 5  |
| Table S4. The deviations between calculated and observed m/z values of each fragment derived from <b>compound 2</b> .....                                           | 6  |
| Table S5. The deviations between calculated and observed m/z values of each fragment derived from <b>compound 4</b> in the extract of leaves exposed to iBuVX ..... | 7  |
| Table S6. The deviations between calculated and observed m/z values of each fragment derived from <b>compound 5</b> in the extract of leaves exposed to iBuVX ..... | 7  |
| Table S7. The deviations between calculated m/z and observed values of each fragment derived from <b>compound 7</b> in the extract of leaves exposed to iBuVX ..... | 8  |
| Table S8. The assignment of $^1\text{H}$ NMR of the synthesized <b>compound 6</b> .....                                                                             | 10 |
| Table S9. The assignment of $^{13}\text{C}$ NMR of the synthesized <b>compound 6</b> .....                                                                          | 11 |
| Table S10. The deviations between calculated and observed m/z values of each fragment from the synthesized <b>compound 6</b> .....                                  | 12 |

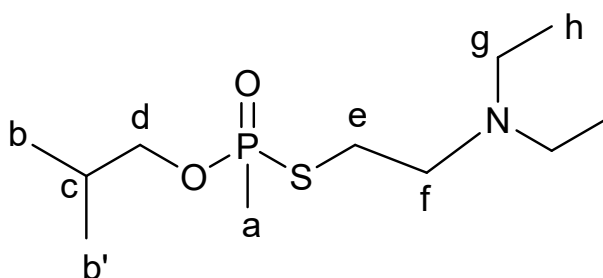

Fig. S1. Chemical structure of iBuVX

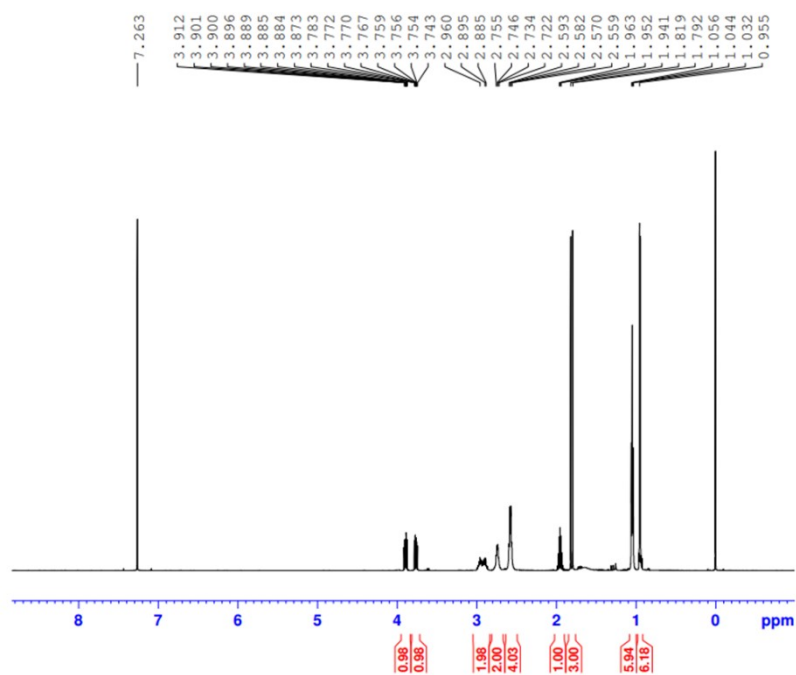

Fig. S2.  $^1\text{H}$  NMR spectrum of iBuVX

Table S1. The assignment of  $^1\text{H}$  NMR of iBuVX

| Assignment | Chemical shift(ppm) | Coupling constant(Hz) |
|------------|---------------------|-----------------------|
| a          | 1.81                | $^3J_{a-p}=16.20$     |
| b          | 0.96                | $^3J_{d-p}=7.80$      |
| c          | 1.95                | $^3J_{d'-p}=7.20$     |
| d,d'       | 3.76,3.89           | $^3J_{c-d}=6.60$      |
| e          | 2.91                | $^3J_{c-d'}=6.60$     |
| f          | 2.74                | $^3J_{h-g}=7.20$      |
| g          | 2.58                | $^3J_{d-d'}=9.60$     |
| h          | 1.04                |                       |

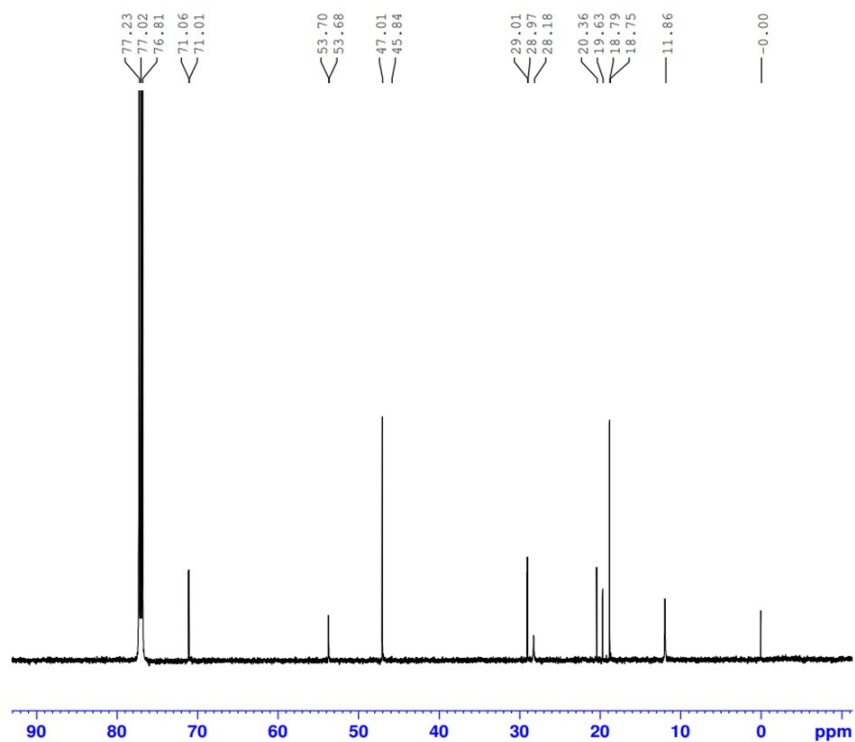

Fig. S3.  $^{13}\text{C}$  NMR spectrum of iBuVX

Table S2. The assignment of  $^{13}\text{C}$  NMR of iBuVX

| Assignment | Chemical shift(ppm) | Coupling constant(Hz) |
|------------|---------------------|-----------------------|
| a          | 20.00               | $J_{a-p}=110.16$      |
| b,b'       | 18.79,18.75         | $J_{c-p}=6.04$        |
| c          | 28.99               | $J_{d-p}=7.54$        |
| d          | 71.04               | $J_{f-p}=3.02$        |
| e          | 28.18               |                       |
| f          | 53.69               |                       |
| g          | 47.01               |                       |
| h          | 11.86               |                       |

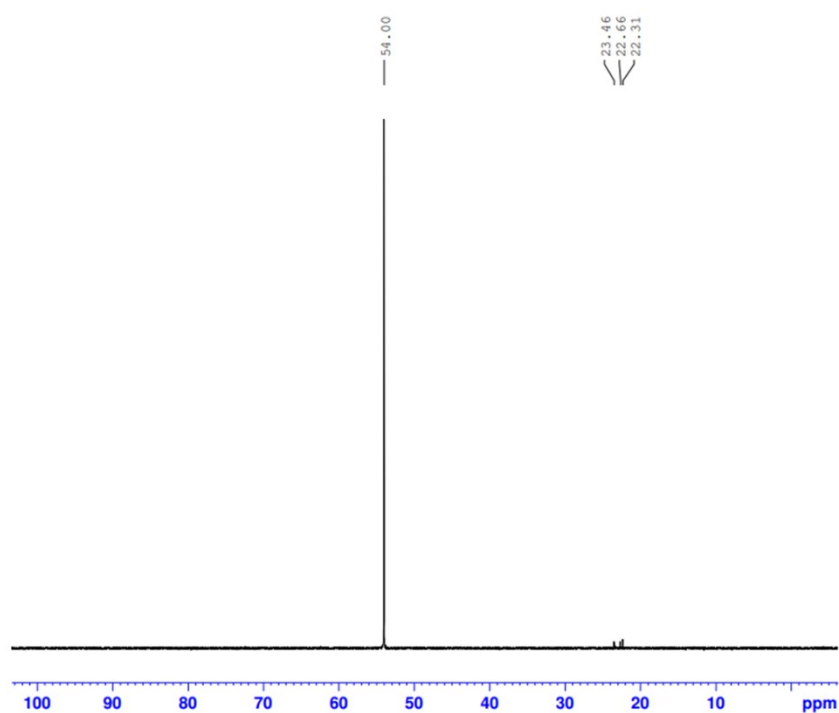

Fig. S4.  $^{31}\text{P}$  NMR spectrum of iBuVX

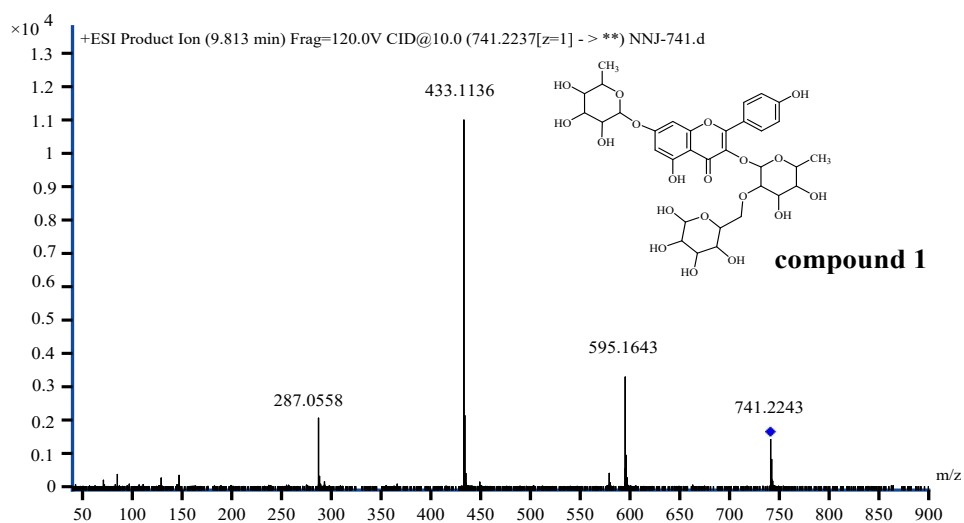

Fig. S5. Product ion mass spectrum of **compound 1**

Table S3. The deviations between calculated and observed  $m/z$  values of each fragment derived from **compound 1**

| Fragment                                                                                     | Calculated $m/z$ | Observed $m/z$ | Deviation |
|----------------------------------------------------------------------------------------------|------------------|----------------|-----------|
| $[\text{M}+\text{H}]^+$                                                                      | 741.2237         | 741.2243       | 0.87 ppm  |
| $[\text{M}+\text{H}-\text{C}_6\text{H}_{10}\text{O}_4]^+$                                    | 595.1657         | 595.1643       | -2.43 ppm |
| $[\text{M}+\text{H}-\text{C}_6\text{H}_{10}\text{O}_4-\text{C}_6\text{H}_{10}\text{O}_5]^+$  | 433.1129         | 433.1136       | 1.57 ppm  |
| $[\text{M}+\text{H}-2\text{C}_6\text{H}_{10}\text{O}_4-\text{C}_6\text{H}_{10}\text{O}_5]^+$ | 287.0550         | 287.0558       | 2.75 ppm  |

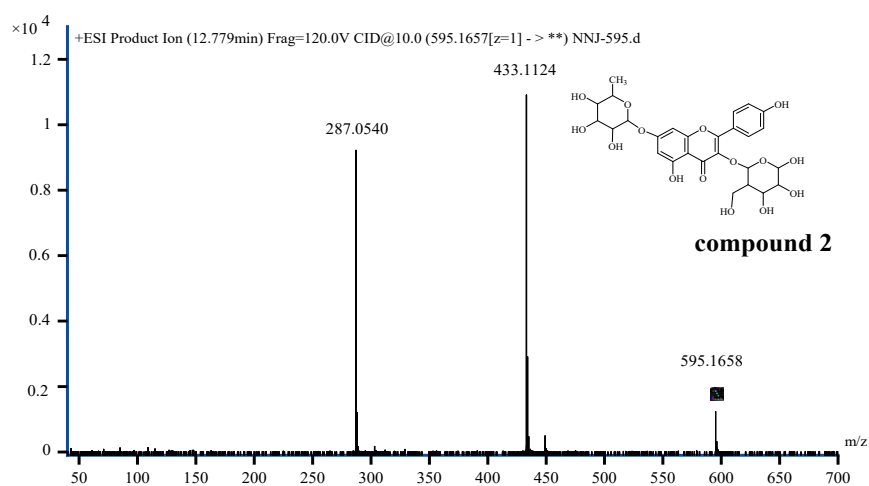

Fig. S6. Product ion mass spectrum of **compound 2**

Table S4. The deviations between calculated and observed m/z values of each fragment derived from **compound 2**

| Fragment                            | Calculated m/z | Observed m/z | Deviation |
|-------------------------------------|----------------|--------------|-----------|
| $[M+H]^+$                           | 595.1657       | 595.1658     | 0.09 ppm  |
| $[M+H-C_6H_{10}O_4]^+$              | 433.1129       | 433.1124     | -1.21 ppm |
| $[M+H-C_6H_{10}O_4-C_6H_{10}O_5]^+$ | 287.0550       | 287.0540     | -3.55 ppm |

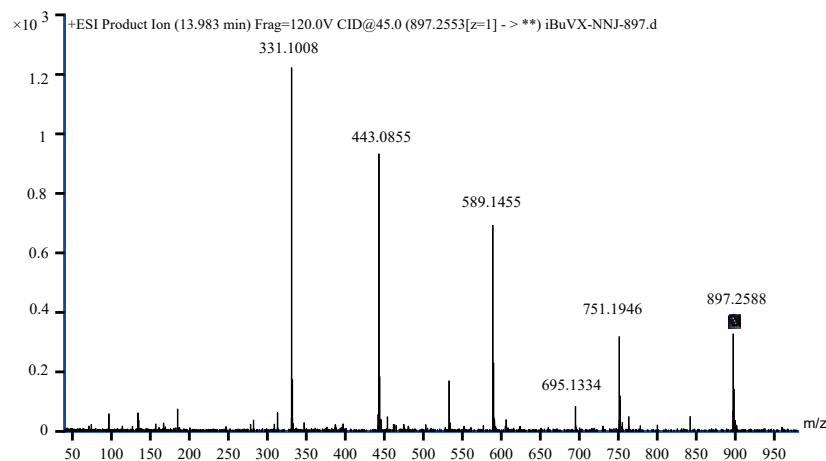

Fig. S7. Product ion mass spectrum of m/z 897.2553 (**compound 4**) in the extracts of leaves from *Arabidopsis thaliana* (L.) exposed to iBuVX

Table S5. The deviations between calculated and observed m/z values of each fragment derived from **compound 4** in the extract of leaves exposed to iBuVX

| Fragment                                 | Calculated m/z | Observed m/z | Deviation |
|------------------------------------------|----------------|--------------|-----------|
| $[M+Na]^+$                               | 897.2553       | 897.2588     | 4.04 ppm  |
| $[M+Na-C_6H_{10}O_4]^+$                  | 751.1974       | 751.1946     | -3.79 ppm |
| $[M+Na-C_6H_{10}O_4-C_4H_8]^+$           | 695.1348       | 695.1334     | -2.02 ppm |
| $[M+Na-C_6H_{10}O_4-C_6H_{10}O_5]^+$     | 589.1445       | 589.1455     | 1.71 ppm  |
| $[M+Na-2C_6H_{10}O_4-C_6H_{10}O_5]^+$    | 443.0866       | 443.0855     | -2.68 ppm |
| $[M+Na-C_6H_{10}O_4-C_{20}H_{21}O_8P]^+$ | 331.1000       | 331.1008     | 2.75 ppm  |

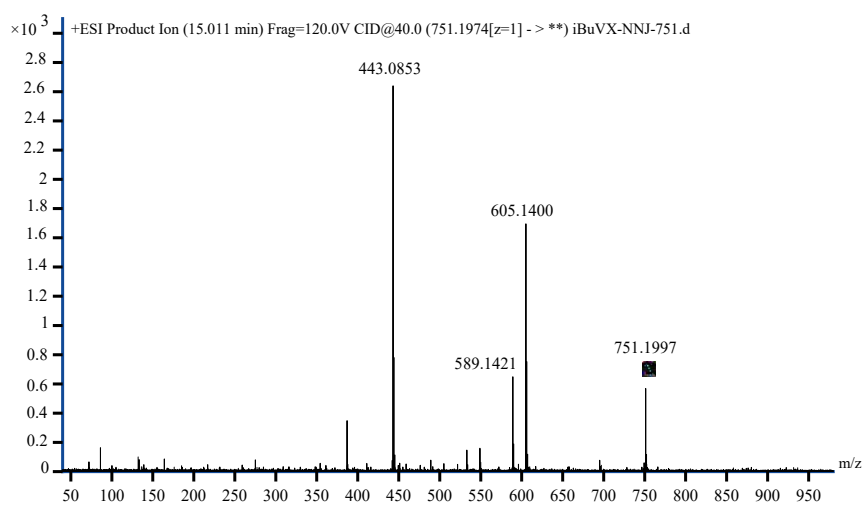

Fig. S8. Product ion mass spectrum of m/z 751.1974 (**compound 5**) in the extracts of leaves from *Arabidopsis thaliana* (L.) exposed to iBuVX

Table S6. The deviations between calculated and observed m/z values of each fragment derived from **compound 5** in the extract of leaves exposed to iBuVX

| Fragment                             | Calculated m/z | Observed m/z | Deviation |
|--------------------------------------|----------------|--------------|-----------|
| $[M+Na]^+$                           | 751.1974       | 751.1997     | 3.22 ppm  |
| $[M+Na-C_6H_{10}O_4]^+$              | 605.1394       | 605.1400     | 0.95 ppm  |
| $[M+Na-C_6H_{10}O_5]^+$              | 589.1445       | 589.1421     | -4.30 ppm |
| $[M+Na-C_6H_{10}O_5-C_6H_{10}O_4]^+$ | 443.0866       | 443.0853     | -3.15 ppm |

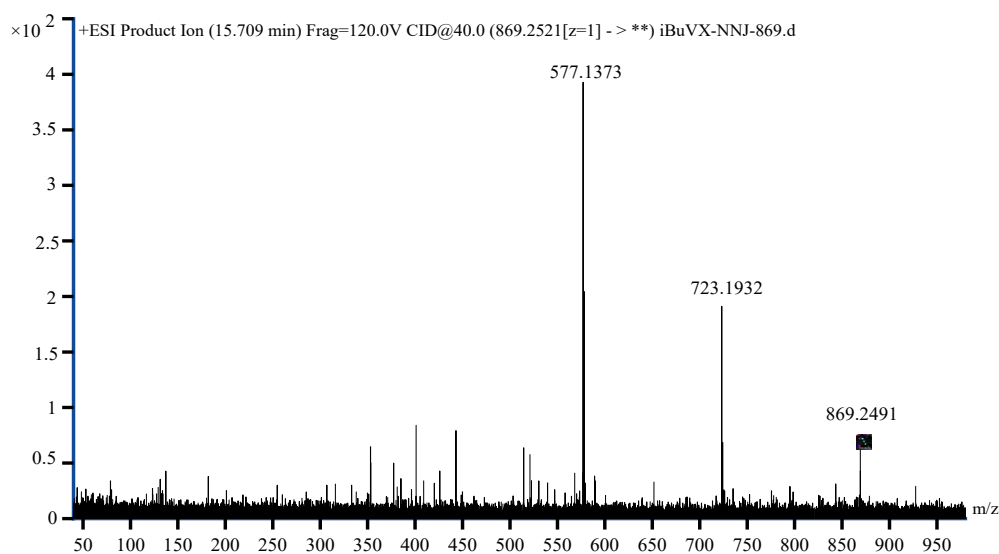

Fig. S9. Product ion mass spectrum of  $m/z$  869.2521(**compound 7**) in the extracts of leaves from *Arabidopsis thaliana* (L.) exposed to iBuVX

Table S7. The deviations between calculated  $m/z$  and observed values of each fragment derived from **compound 7** in the extract of leaves exposed to iBuVX

| Fragment                 | Calculated $m/z$ | Observed $m/z$ | Deviation |
|--------------------------|------------------|----------------|-----------|
| $[M+Na]^+$               | 869.2521         | 869.2491       | -3.56 ppm |
| $[M+Na-C_6H_{10}O_4]^+$  | 723.1942         | 723.1932       | -1.43 ppm |
| $[M+Na-2C_6H_{10}O_4]^+$ | 577.1363         | 577.1373       | 1.82 ppm  |

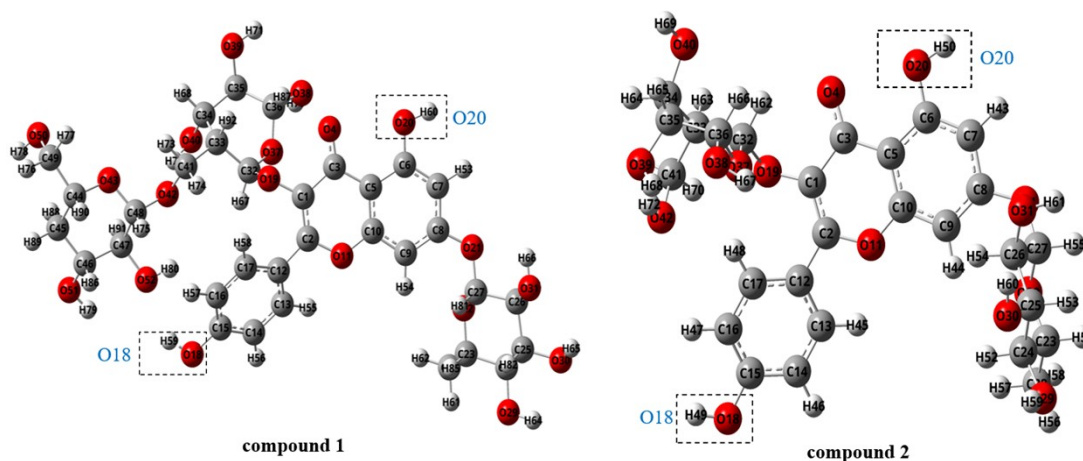

Fig. S10 The lowest energy conformations of **compound 1** and **compound 2**



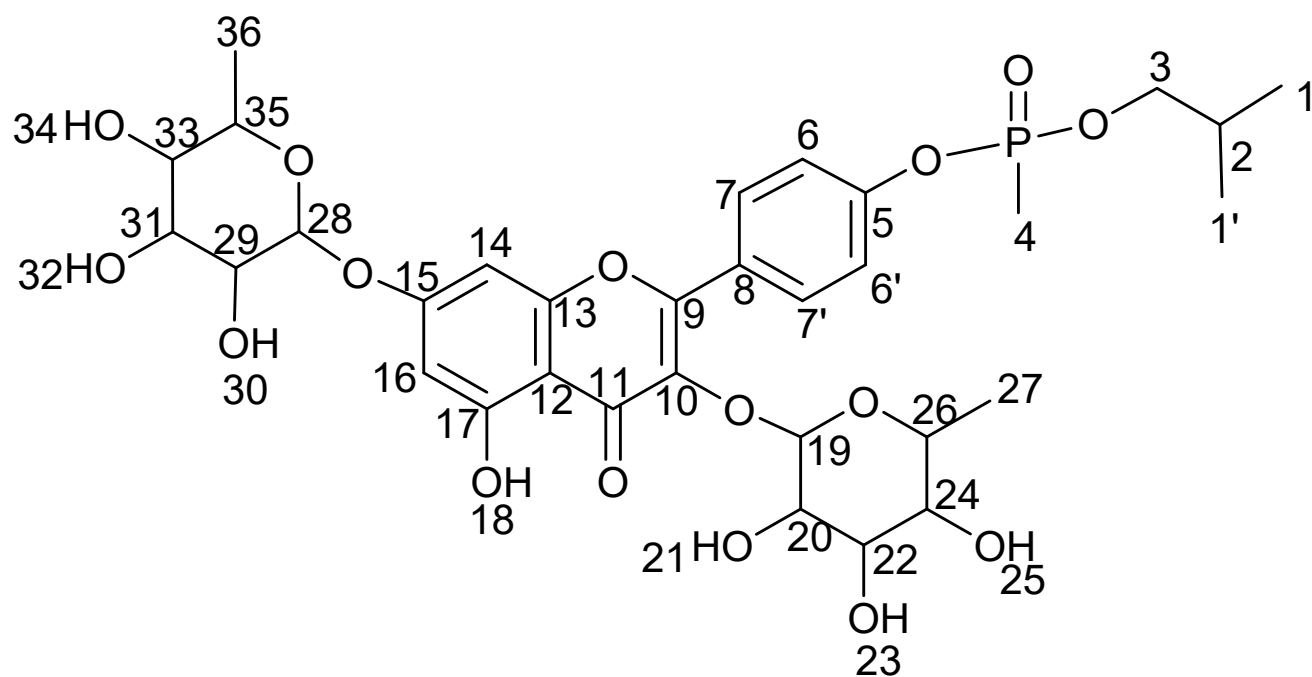

Fig. S11. Chemical structure of the synthesized **compound 6** with atoms numbering

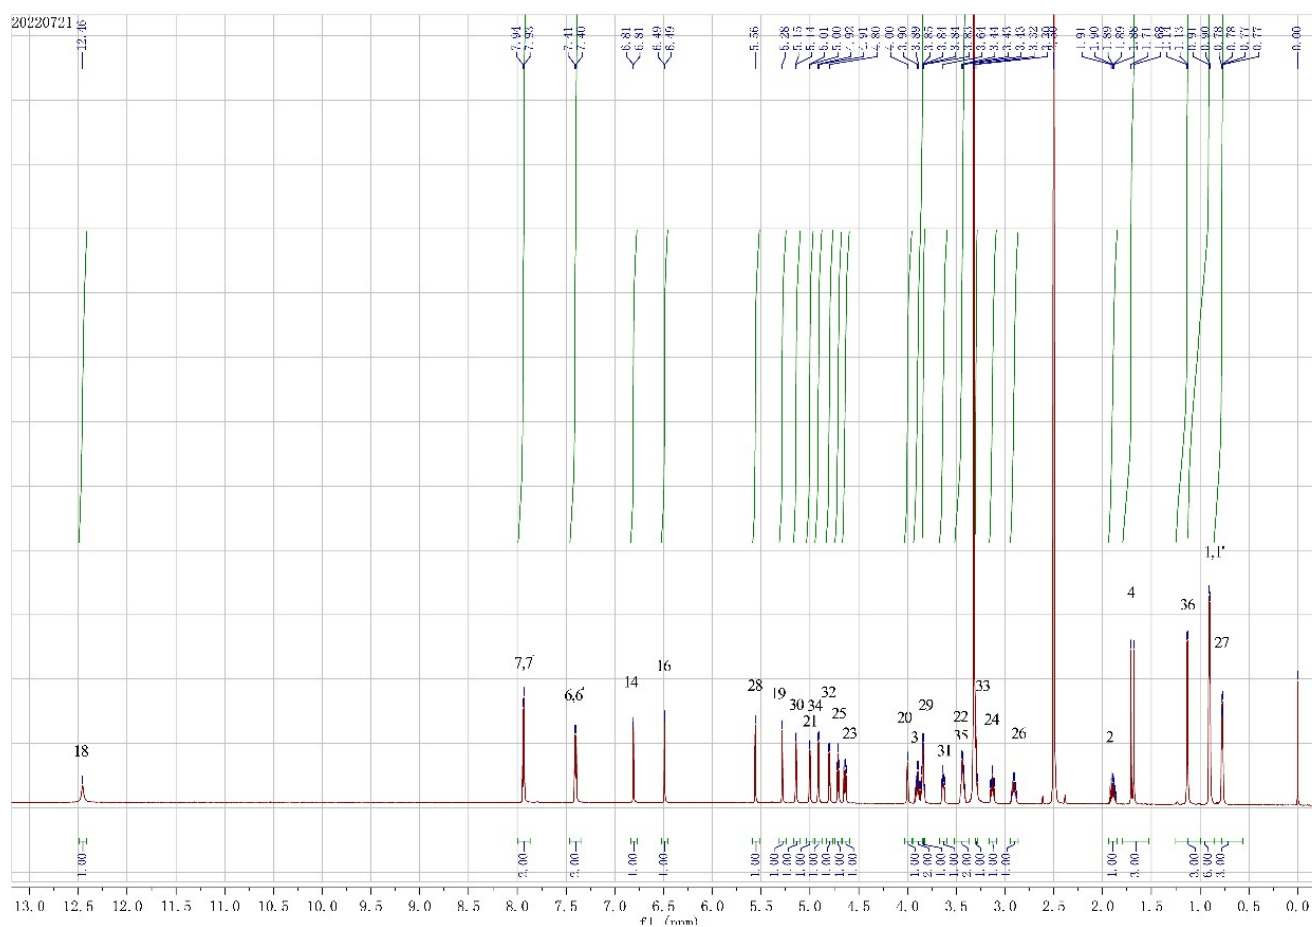

Fig. S12.  $^1\text{H}$  NMR spectrum of the synthesized **compound 6**

| Assignment | Chemical shift(ppm) | Assignment | Chemical shift(ppm) |
|------------|---------------------|------------|---------------------|
| 1,1'       | 0.91                | 24         | 3.13                |
| 2          | 1.90                | 25         | 4.71                |
| 3          | 3.90                | 26         | 2.91                |
| 4          | 1.70                | 27         | 0.78                |
| 6,6'       | 7.40                | 28         | 5.56                |
| 7,7'       | 7.94                | 29         | 3.84                |
| 14         | 6.81                | 30         | 5.14                |
| 16         | 6.49                | 31         | 3.64                |
| 18         | 12.46               | 32         | 4.80                |
| 19         | 5.28                | 33         | 3.30                |
| 20         | 4.00                | 34         | 4.92                |
| 21         | 5.00                | 35         | 3.43                |
| 22         | 3.43                | 36         | 1.13                |
| 23         | 4.64                |            |                     |

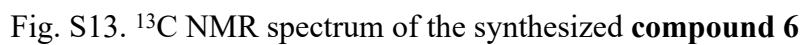

Table S9. The assignment of  $^{13}\text{C}$  NMR of the synthesized **compound 6**

| Assignment | Chemical shift(ppm) | Assignment | Chemical shift(ppm) |
|------------|---------------------|------------|---------------------|
| 1          | 18.93               | 16         | 100.10              |
| 2          | 29.06               | 17         | 161.42              |
| 3          | 72.20               | 19         | 102.64              |
| 4          | 11.04               | 20         | 70.50               |
| 5          | 152.77              | 22         | 70.68               |
| 6          | 120.99              | 24         | 71.50               |
| 7          | 131.33              | 26         | 71.19               |
| 8          | 126.87              | 27         | 17.90               |
| 9          | 157.19              | 28         | 98.89               |
| 10         | 135.96              | 29         | 70.26               |
| 11         | 178.53              | 31         | 70.59               |
| 12         | 106.49              | 33         | 72.03               |
| 13         | 156.76              | 35         | 70.72               |
| 14         | 95.19               | 36         | 18.38               |
| 15         | 162.37              |            |                     |

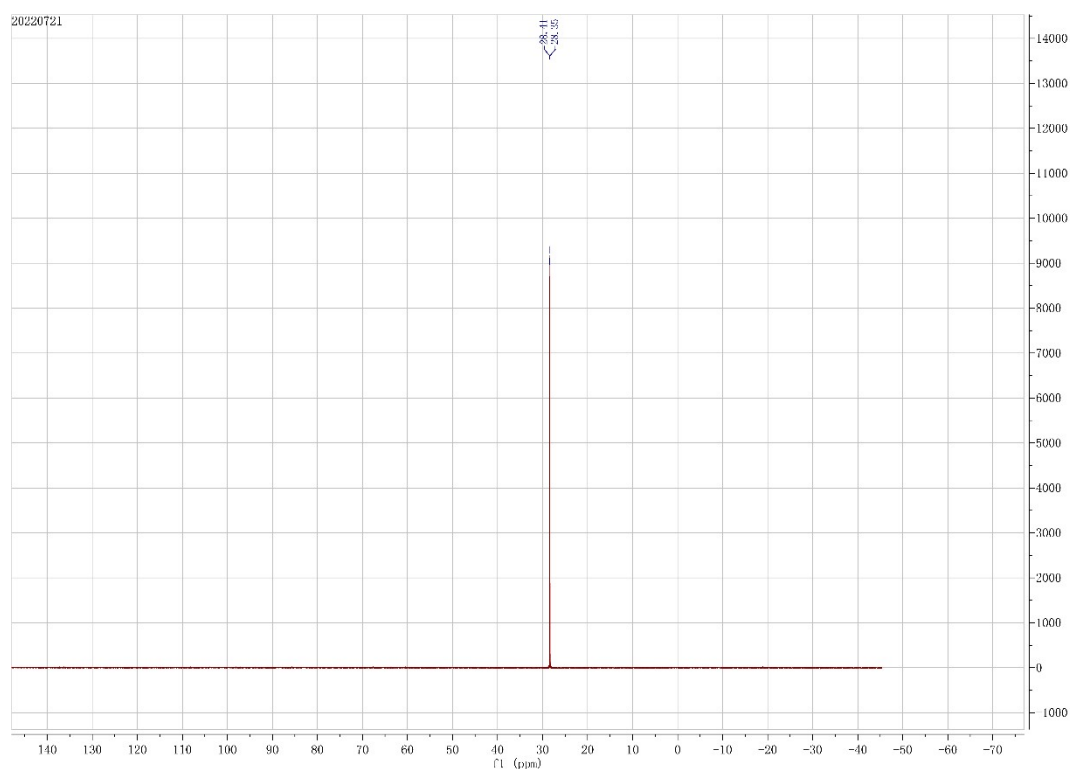

Fig. S14.  $^{31}\text{P}$  NMR spectrum of the synthesized **compound 6**

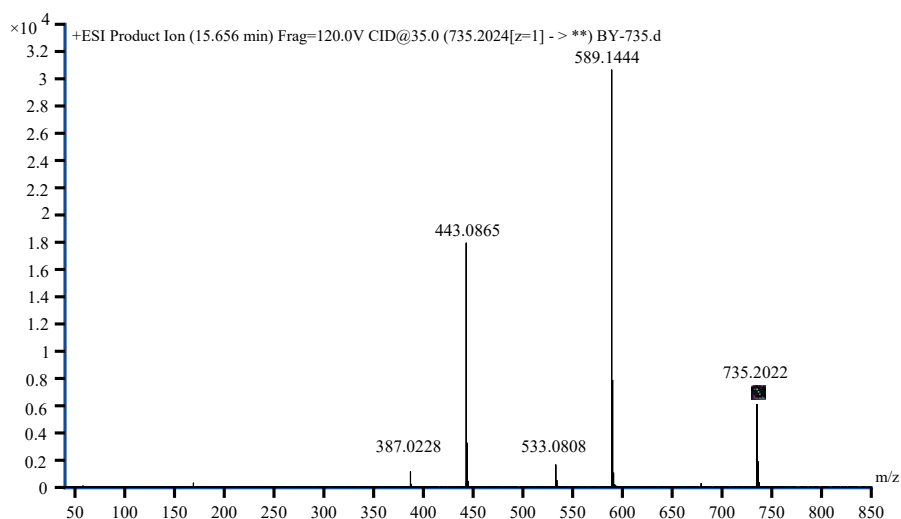

Fig. S15. Product ion mass spectrum of m/z 735.2024 from the synthesized **compound 6**

Table S10. The deviations between calculated and observed m/z values of each fragment from the synthesized **compound 6**

| Fragment                        | Calculated m/z | Observed m/z | Deviation |
|---------------------------------|----------------|--------------|-----------|
| $[M+Na]^+$                      | 735.2024       | 735.2022     | -0.34 ppm |
| $[M+Na-C_6H_{10}O_4]^+$         | 589.1445       | 589.1444     | -0.24 ppm |
| $[M+Na-C_6H_{10}O_4-C_4H_8]^+$  | 533.0819       | 533.0808     | -2.22 ppm |
| $[M+Na-2C_6H_{10}O_4]^+$        | 443.0866       | 443.0865     | -0.30 ppm |
| $[M+Na-2C_6H_{10}O_4-C_4H_8]^+$ | 387.0240       | 387.0228     | -3.36 ppm |

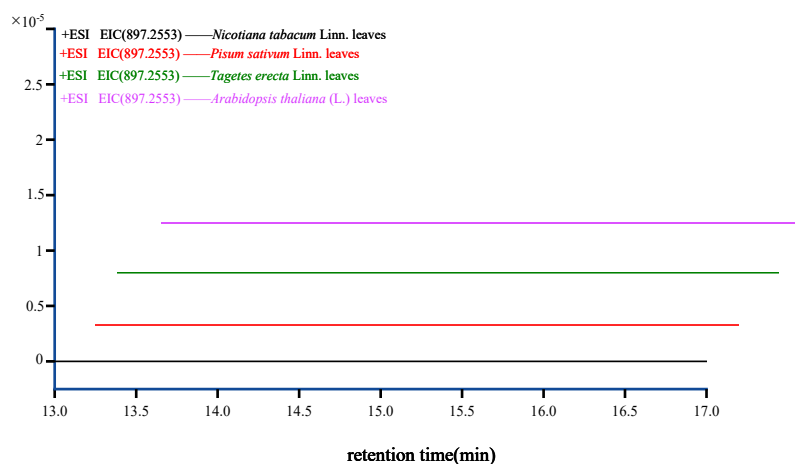

Fig. S16. EICs (m/z 897.2553) of the extracts of leaves from plants of *Nicotiana tabacum* Linn., *Pisum sativum* Linn., *Tagetes erecta* Linn. and *Arabidopsis thaliana* (L.) leaves with no exposure to iBuVX

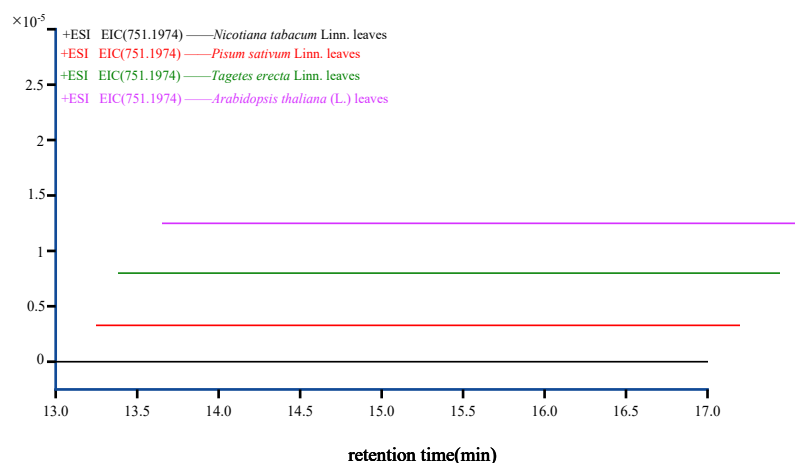

Fig. S17. EICs (m/z 751.1974) of the extracts of leaves from plants of *Nicotiana tabacum* Linn., *Pisum sativum* Linn., *Tagetes erecta* Linn. and *Arabidopsis thaliana* (L.) leaves with no exposure to iBuVX

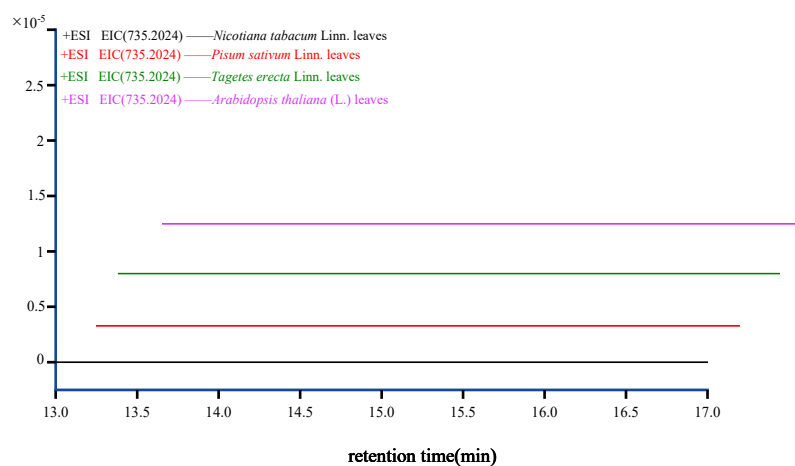

Fig. S18. EICs (m/z 735.2024) of the extracts of leaves from plants of *Nicotiana tabacum* Linn., *Pisum sativum* Linn., *Tagetes erecta* Linn. and *Arabidopsis thaliana* (L.) leaves with no exposure to iBuVX

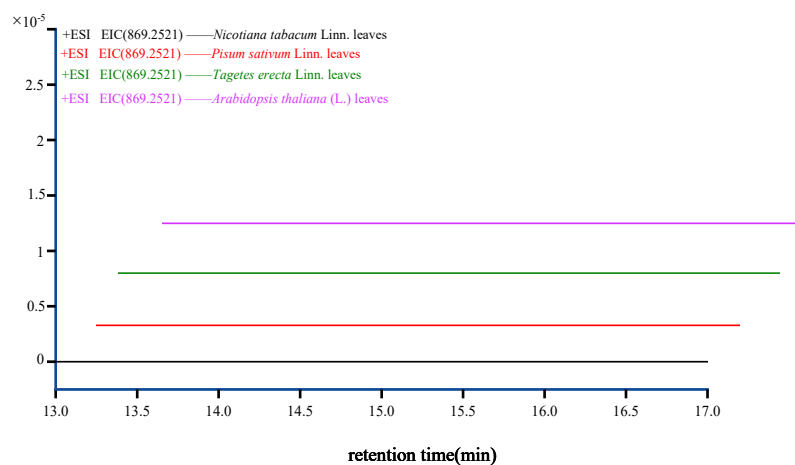

Fig. S19. EICs (m/z 869.2521) of the extracts of leaves from plants of *Nicotiana tabacum* Linn., *Pisum sativum* Linn., *Tagetes erecta* Linn. and *Arabidopsis thaliana* (L.) leaves with no exposure to iBuVX
